# Supplementary material for: Integrative Lighting Aimed at Patients with Psychiatric and Neurological Disorders
Source: MDPI journal article supplement (doi:10.3390/clockssleep5040052), 2023-12-15
Supplement: s1 [file s1]

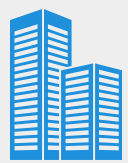

Test: **Example for visual presentation of the results**

Measurement Location (1st floor, room type: patient room)

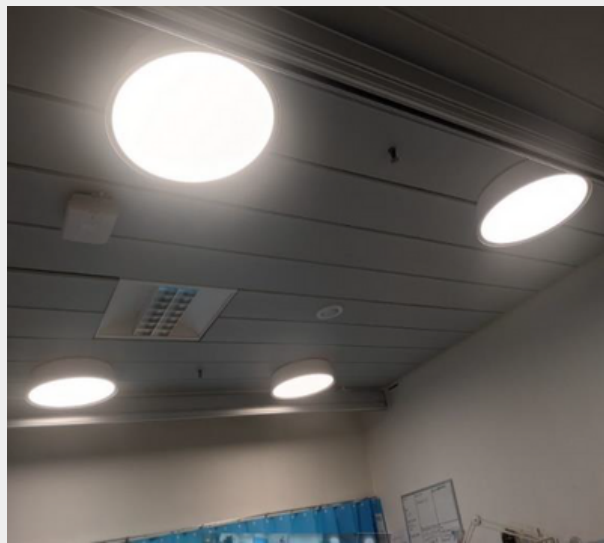

|                                                       |                      |
|-------------------------------------------------------|----------------------|
| Measurement Point                                     | 3                    |
| Orientation                                           | South                |
| Measurement Time                                      | 10:08:45 AM 12-01-22 |
| Measurement Height (cm)                               | 104                  |
| Measurement of Spectrum Within the Visual Field (SPD) |                      |

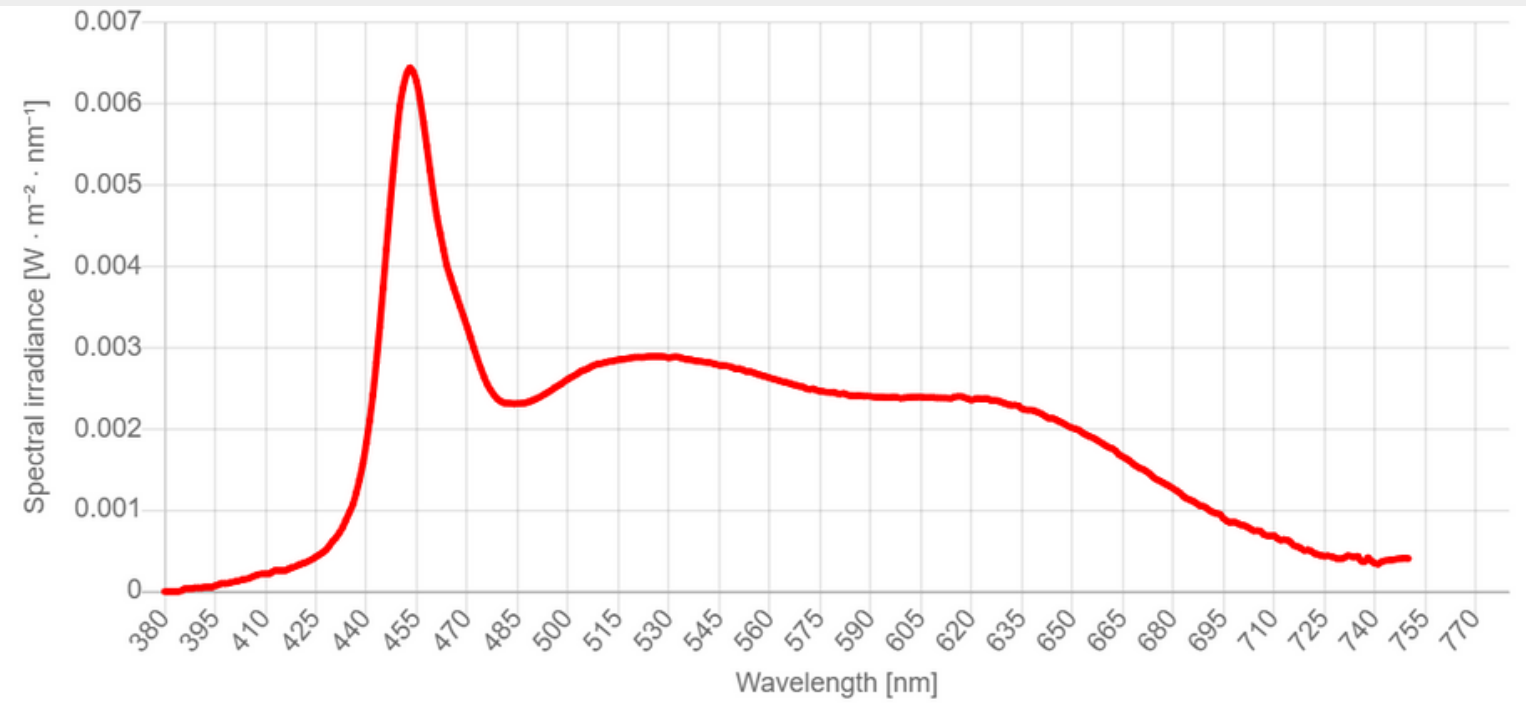

Visual (Image-forming Light)

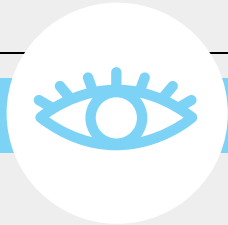

Illuminance (Lux)

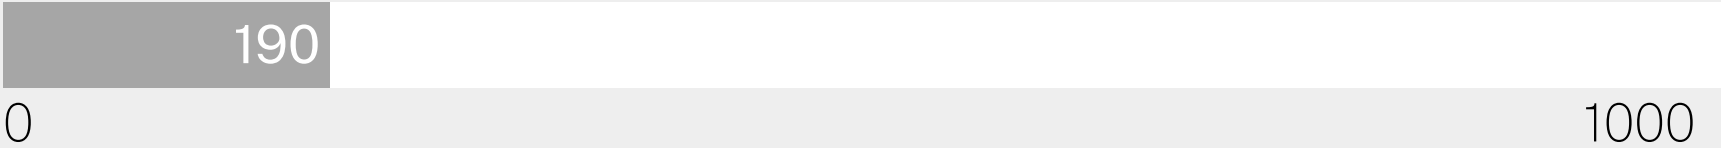

Color-rendering (CRI)

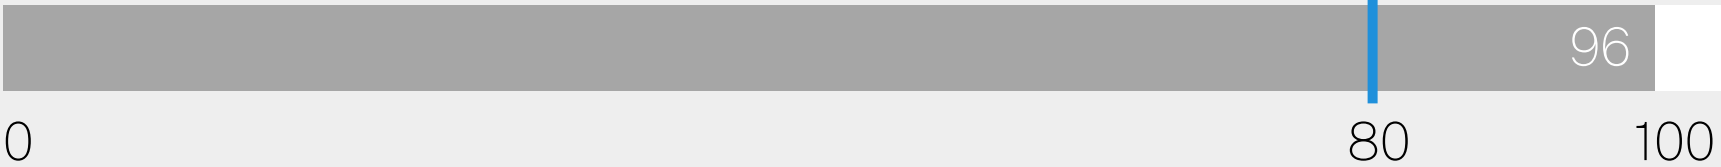

Colortemperature (K)

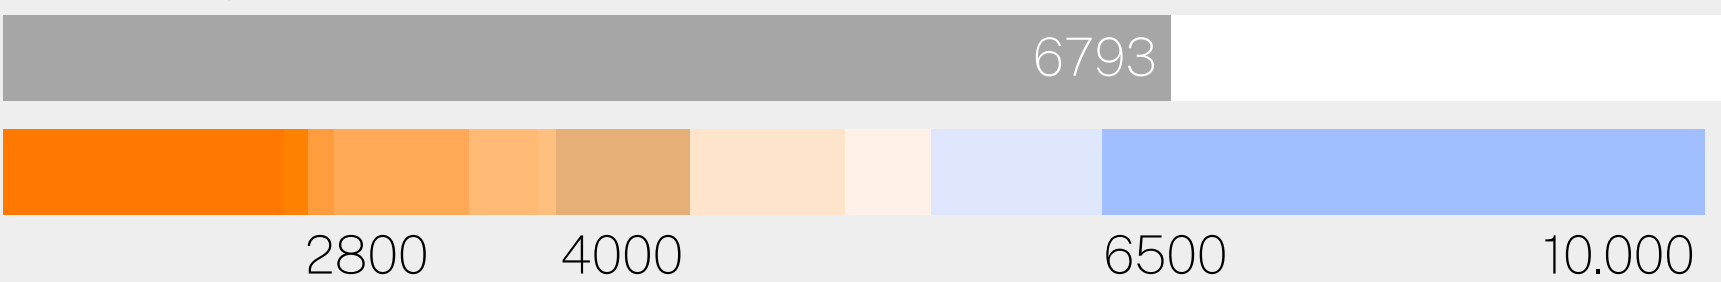

Non-image forming light (Integrative Lighting)

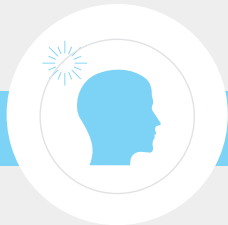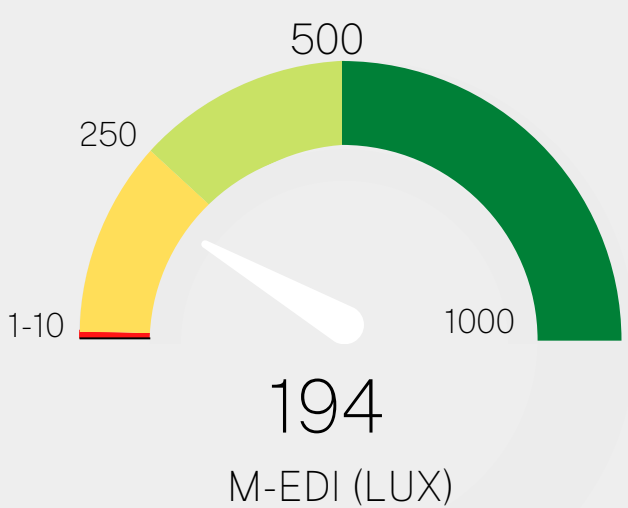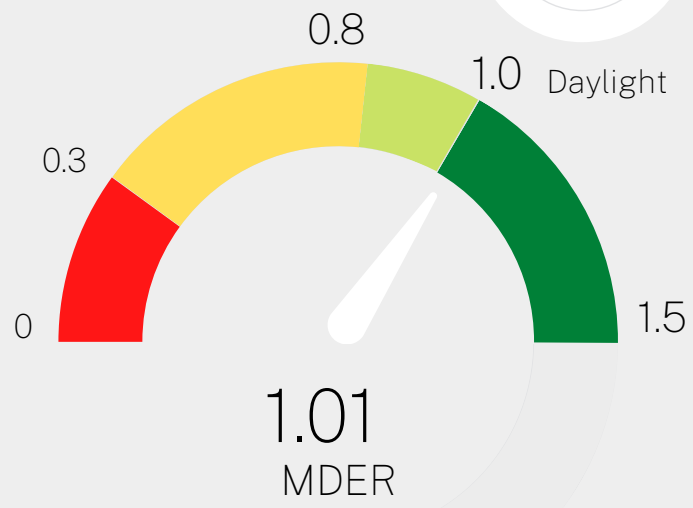

- Sleep promoting - 1 MEDI
- Active/ Awake Night - 10 MEDI
- Below Daytime Threshold
- Min. Daytime Threshold - 250 MEDI
- Superior Daytime Threshold - 500 MEDI

- Sleep Promoting - 0.3
- Active Light - 0.8
- D65 Daylight - 1.0
